# Supplementary material
Source: Atypon-hosted journal article supplement (doi:10.1287/ijoc.2024.0704)

Performance Profiles

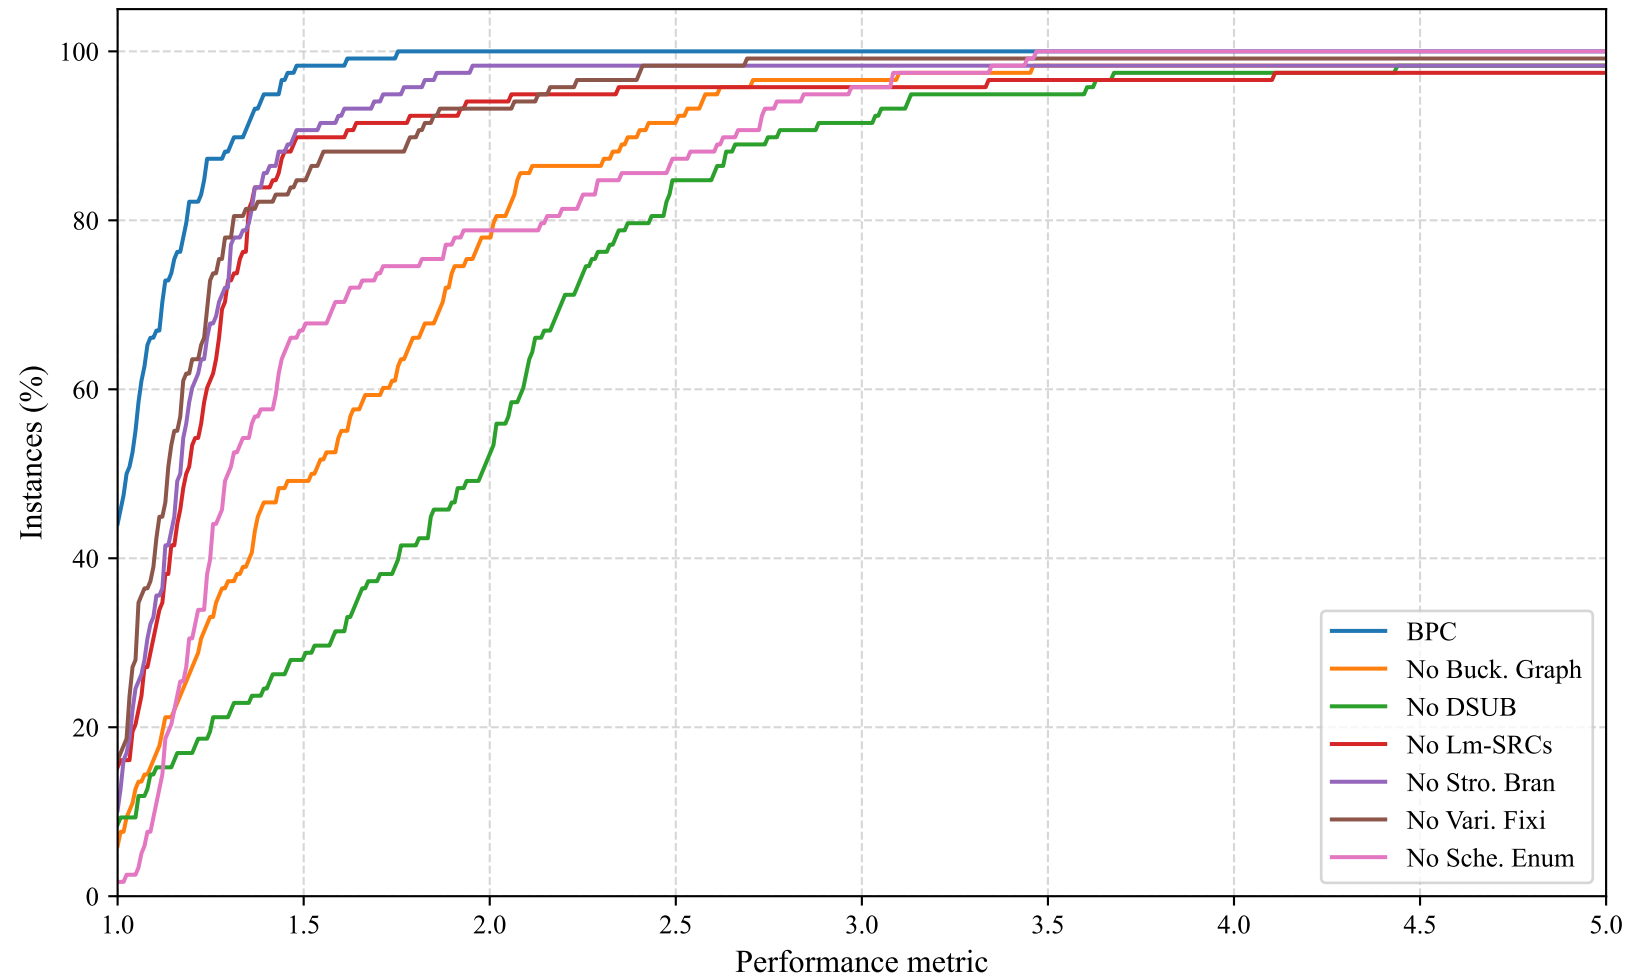

Supplement: ijoc.2024.0704.cd.zip [file updated performance profile large instances.pdf › 2024.0704-main/results/Performance Profiles/updated performance profile large instances.pdf]

Performance Profiles

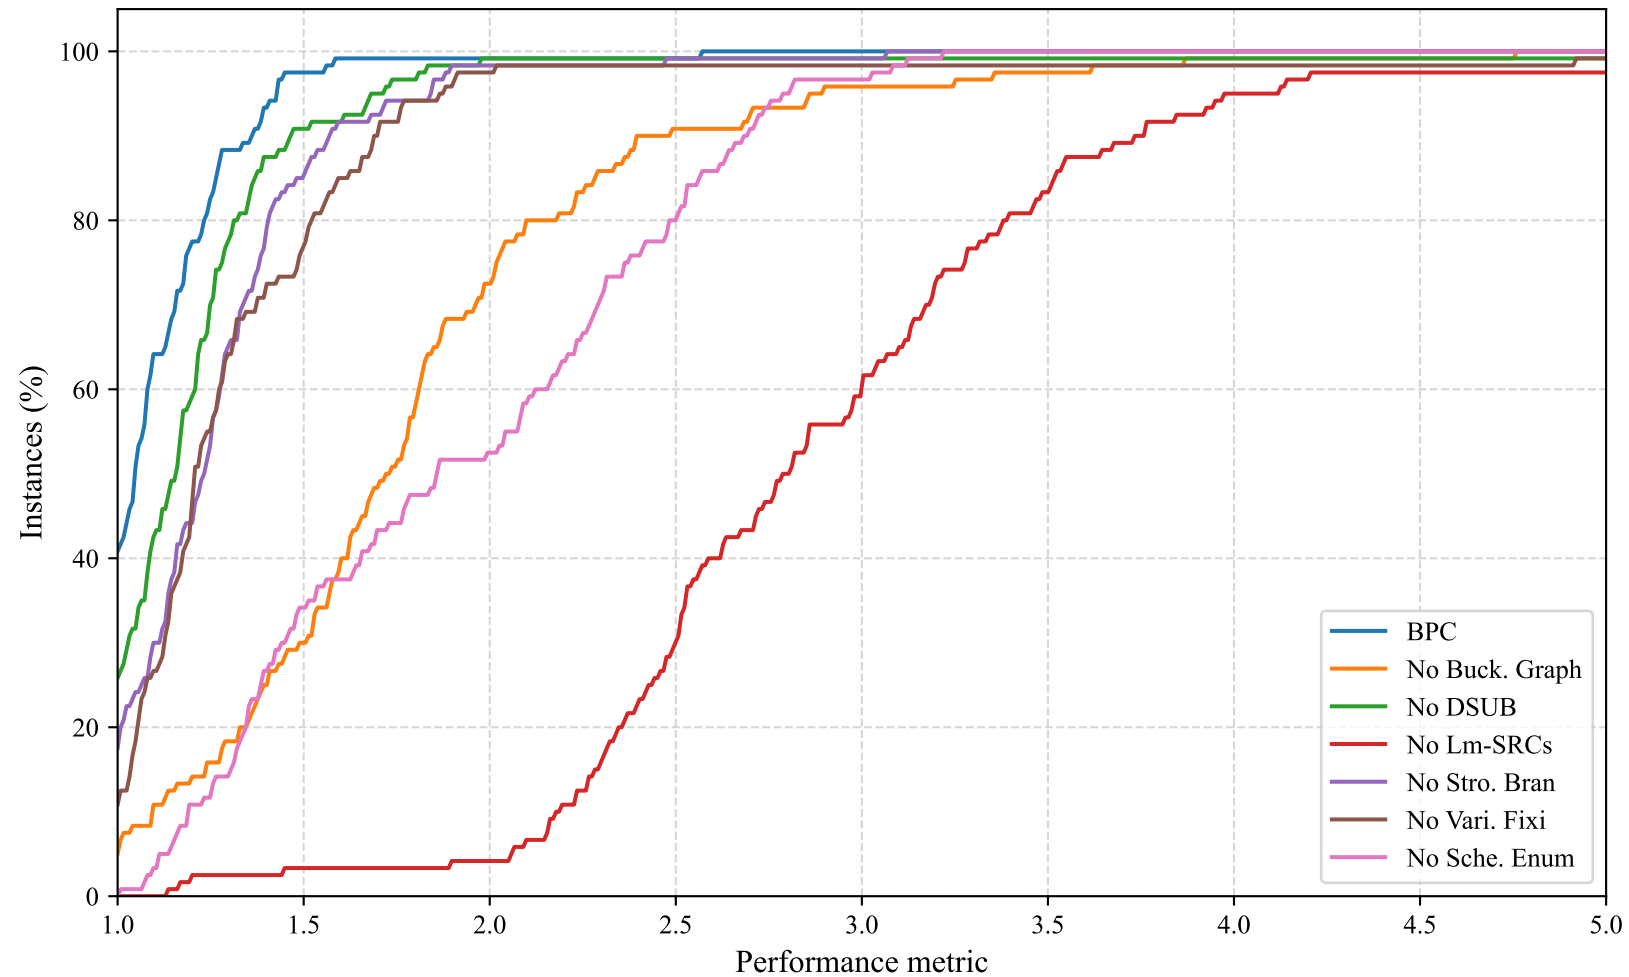

Supplement: ijoc.2024.0704.cd.zip [file updated performance profile medium instances.pdf › 2024.0704-main/results/Performance Profiles/updated performance profile medium instances.pdf]

Performance Profiles

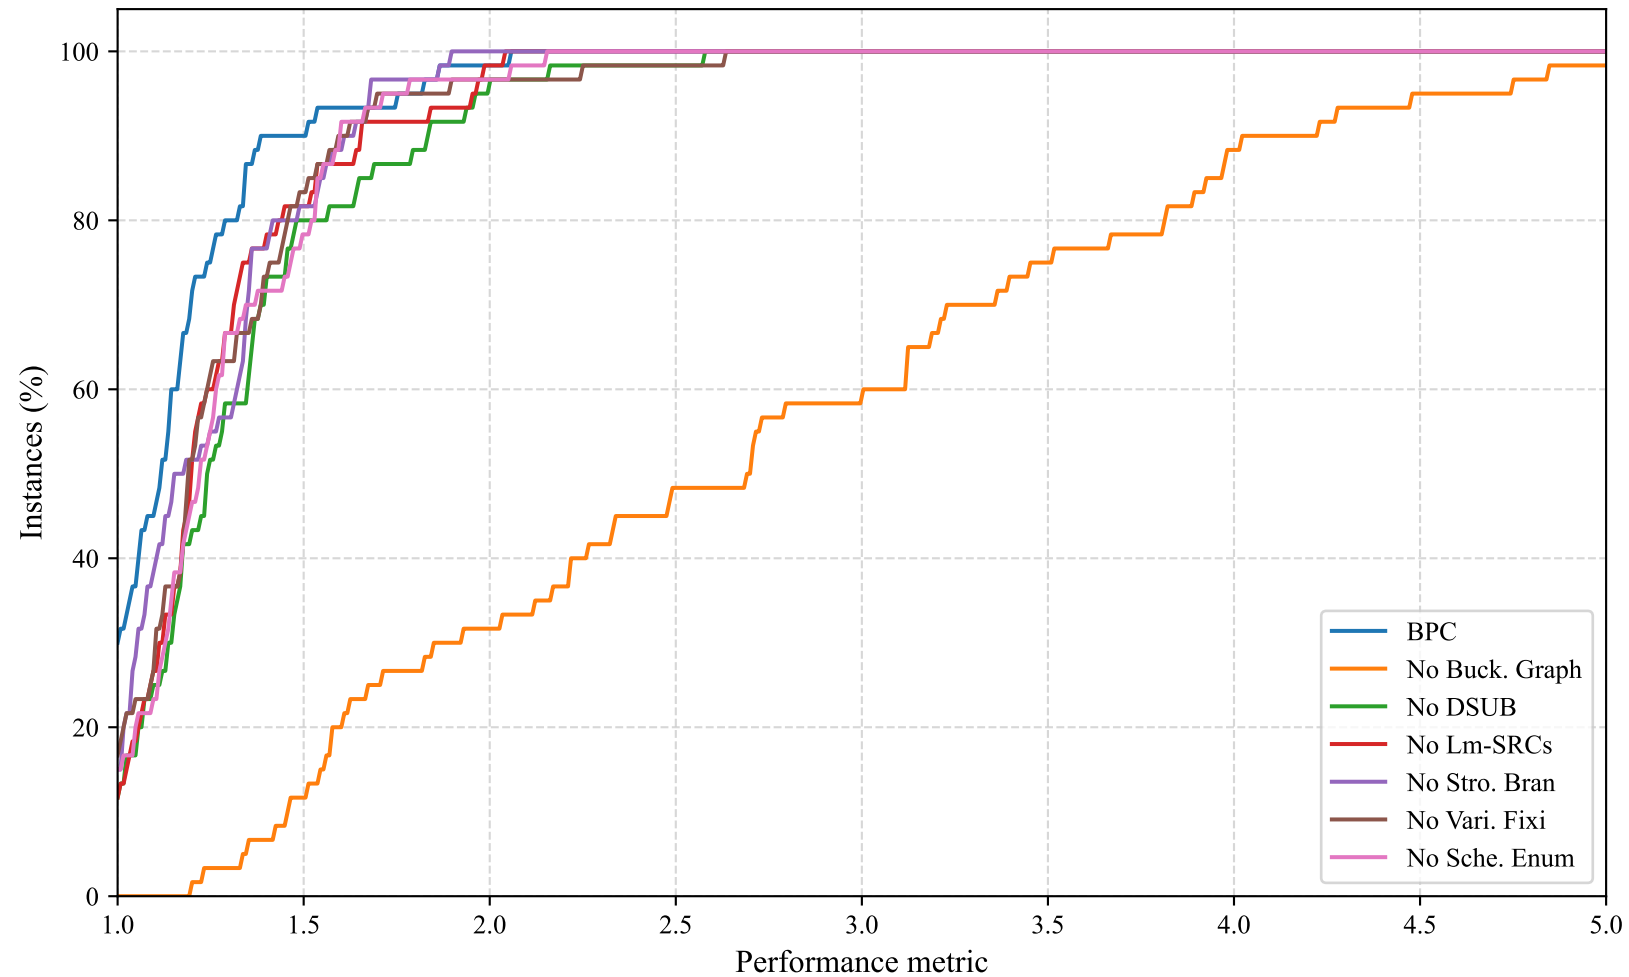

Supplement: ijoc.2024.0704.cd.zip [file updated performance profile small instances.pdf › 2024.0704-main/results/Performance Profiles/updated performance profile small instances.pdf]
